# Supplementary material
Source: ML conference proceedings conference paper supplement (https://proceedings.mlr.press/v216/chen23b.html)
Supplement: Supplementary file 1 [file chen23b-supp.pdf]

---

# Benign Overfitting in Adversarially Robust Linear Classification (Supplementary Material)

---

Jinghui Chen<sup>1\*</sup>

Yuan Cao<sup>2\*</sup>

Quanquan Gu<sup>3</sup>

<sup>1</sup>The Pennsylvania State University, jzc5917@psu.edu

<sup>2</sup>The University of Hong Kong, yuancao@hku.hk

<sup>3</sup>University of California, Los Angeles, qgu@cs.ucla.edu

\*Equal contribution

## A COMPARISON WITH DAN ET AL. (2020), TAHERI ET AL. (2020) AND JAVANMARD & SOLTANOLKOTABI (2020)

Dan et al. [2020] proposed an adversarial signal to noise ratio and studied the excess risk lower/upper bounds for learning Gaussian mixture models. Compared to the setting studied in Dan et al. [2020], our setting covers additional label flipping noises. More importantly, we study an estimator found by gradient descent that overfits the training data, while Dan et al. [2020] studied a specific plug-in estimator which does not overfit the training data. Due to these differences, there is a discrepancy in the risk bounds derived in both papers.

Taheri et al. [2020], Javanmard and Soltanolkotabi [2020] studied adversarial learning of linear models in the proportional limit setting, i.e.,  $d/n = O(1)$ . In this setting, the data Gram matrix and the sample covariance matrix can be studied based on random matrix theory/Gaussian comparison inequalities/convex Gaussian min-max theorem. In contrast, in our setting where  $d > \tilde{O}(n^2)$ , the sample covariance matrix is singular but the  $n \times n$  Gram matrix concentrates around its expectation. Therefore, our setting is different from the proportional limit setting in Taheri et al. [2020], Javanmard and Soltanolkotabi [2020], and these results are not directly comparable.

## B PROOF OF KEY TECHNICAL LEMMAS

### B.1 PROOF OF LEMMA ??

*Proof.* We first prove that  $L(\theta_1) \leq 2n$ . To show this, we observe that  $\theta_1 = \alpha_0 \sum_{k=1}^n \mathbf{z}_k$ . Therefore

$$\begin{aligned} L(\theta_1) &= \sum_{k=1}^n \exp(-\theta_1^\top \mathbf{z}_k + \epsilon \|\theta_1\|_q) \\ &= \sum_{k=1}^n \exp\left(-\alpha_0 \sum_{i=1}^n \mathbf{z}_i^\top \mathbf{z}_k + \alpha_0 \epsilon \left\| \sum_{i=1}^n \mathbf{z}_i \right\|_q\right) \\ &\leq \sum_{k=1}^n \exp\left(\alpha_0 n \left(c_0 (\|\boldsymbol{\mu}\|_2^2 + \sqrt{d \log(n/\delta)}) + \epsilon \sqrt{c_0 d}\right)\right) \\ &\leq \sum_{k=1}^n \exp(1/16) \leq 2n, \end{aligned}$$

where the first equality holds due to Lemma ?? and the fact that for any  $\mathbf{u} \in \mathbb{R}^d$ ,  $\|\mathbf{u}\|_q \leq \|\mathbf{u}\|_1 \leq \sqrt{d} \|\mathbf{u}\|_2$ , while the second inequality is by the choice of sufficiently small  $\alpha_0$  and the assumptions that  $d \geq Cn \|\boldsymbol{\mu}\|_2^2$  and  $\epsilon \leq R$  for some absolute constants  $C$  and  $R$ .

The rest part of Lemma ?? summarizes parts of the results in Li et al. [2020]. However, the results in Li et al. [2020] are

derived under the setting that  $\|\mathbf{x}_i\|_2 \leq 1$ , Therefore to prove lemma ??, we re-scale our data and model parameters and convert our setting to the setting in Li et al. [2020].

By lemma ??, with probability at least  $1 - \delta$ ,  $\|\mathbf{x}_i\|_2^2 \leq c_0 d$  for all  $i \in [n]$ . We therefore denote  $B := \sqrt{c_0 d}$ , and then  $\tilde{\mathbf{x}}_i := \mathbf{x}_i/B$  has  $\ell_2$ -norm less than or equal to one. Further denote by  $\beta_t$  the linear model parameters in Li et al. [2020]'s algorithm,  $\tilde{\mathbf{z}}_i = y_i \tilde{\mathbf{x}}_i$ ,  $\eta_t$  as their step sizes,  $\tilde{\epsilon}$  as their perturbation strength, and

$$\tilde{\gamma} := \max_{\|\boldsymbol{\theta}\|_2=1} \min_{i \in [n]} y_i \boldsymbol{\theta}^\top \tilde{\mathbf{x}}_i$$

as the  $\ell_p$  margin. Then the adversarial training update rule in Li et al. [2020] is

$$\beta_{t+1} = \beta_t - \frac{\eta_t}{n} \sum_{i=1}^n \nabla_{\beta} \exp(-\beta_t^\top \tilde{\mathbf{z}}_k + \tilde{\epsilon} \|\beta_t\|_q).$$

Note that our update rule is

$$\boldsymbol{\theta}_{t+1} = \boldsymbol{\theta}_t - \alpha_t \sum_{k=1}^n \nabla_{\boldsymbol{\theta}} \exp(-\boldsymbol{\theta}_t^\top \mathbf{z}_k + \epsilon \|\boldsymbol{\theta}_t\|_q).$$

Now, in order to apply the results in Li et al. [2020], we convert our parameters to match their scaling. Since

$$\begin{aligned} \boldsymbol{\theta}_{t+1} &= \boldsymbol{\theta}_t - \alpha_t \sum_i \nabla_{\boldsymbol{\theta}} \exp(-B\boldsymbol{\theta}_t^\top \mathbf{z}_k/B + \epsilon \|B\boldsymbol{\theta}_t\|_q/B) \\ &= \boldsymbol{\theta}_t - \frac{nB\alpha_t}{n} \sum_i \nabla_{(B\boldsymbol{\theta})} \exp(-B\boldsymbol{\theta}_t^\top \mathbf{z}_k/B + \epsilon \|B\boldsymbol{\theta}_t\|_q/B). \end{aligned}$$

Therefore

$$B\boldsymbol{\theta}_{t+1} = B\boldsymbol{\theta}_t - \frac{nB^2\alpha_t}{n} \sum_i \nabla_{(B\boldsymbol{\theta})} \exp(-B\boldsymbol{\theta}_t^\top \mathbf{z}_k/B + \epsilon \|B\boldsymbol{\theta}_t\|_q/B).$$

It is easy to observe that we can now apply Theorem 3.3 and Theorem 3.4 in Li et al. [2020] by setting  $\beta_t = B\boldsymbol{\theta}_t$ ,  $\eta_t = nB^2\alpha_t$ ,  $\tilde{\epsilon} = \epsilon/B$ . Moreover, by  $\tilde{\mathbf{x}}_i = \mathbf{x}_i/B$ ,  $\tilde{\epsilon} = \epsilon/B$  and the definition of  $\tilde{\gamma}$ , we have  $\tilde{\gamma} = \gamma/B$ . Based on these relations, it is easy to see that under the conditions of Lemma ??,  $\tilde{\mathbf{x}}_i$ ,  $\eta_t$ ,  $\tilde{\epsilon}$ ,  $\tilde{\gamma}$  satisfy the assumptions of Theorems 3.3 and 3.4 in Li et al. [2020]. Now (??) is an intermediate result of the proof of Theorem 3.3 in Li et al. [2020], and (??) follows by Theorem 3.4 in Li et al. [2020].  $\square$

## B.2 PROOF OF LEMMA ??

*Proof.* We have

$$\begin{aligned} \|\boldsymbol{\theta}_{t+1}\|_2 &= \left\| \sum_{m=0}^t \alpha_m \cdot \nabla L(\boldsymbol{\theta}_m) \right\|_2 \\ &\leq \sum_{m=0}^t \alpha_m \|\nabla L(\boldsymbol{\theta}_m)\|_2 \\ &\leq \sum_{m=0}^t \alpha_m \left\| \sum_{k=1}^n (\mathbf{z}_k - \epsilon \cdot \partial \|\boldsymbol{\theta}_m\|_q) \cdot \exp(-\mathbf{z}_k^\top \boldsymbol{\theta}_m + \epsilon \|\boldsymbol{\theta}_m\|_q) \right\|_2, \end{aligned}$$

where the first three inequalities hold by triangle inequality. By Lemma 2, we have

$$\begin{aligned} \|\boldsymbol{\theta}_{t+1}\|_2 &\leq \sum_{m=0}^t \alpha_m \sum_{k=1}^n (\|\mathbf{z}_k\|_2 + \epsilon\sqrt{d}) \cdot \exp(-\mathbf{z}_k^\top \boldsymbol{\theta}_m + \epsilon \|\boldsymbol{\theta}_m\|_q) \\ &\leq (\sqrt{c_0} + \epsilon)\sqrt{d} \sum_{m=0}^t \alpha_m \sum_{k=1}^n \cdot \exp(-\mathbf{z}_k^\top \boldsymbol{\theta}_m + \epsilon \|\boldsymbol{\theta}_m\|_q) \\ &= (\sqrt{c_0} + \epsilon)\sqrt{d} \sum_{m=0}^t \alpha_m L(\boldsymbol{\theta}_m), \end{aligned}$$

where the second inequality is due to Lemma ??.

$\square$

### B.3 PROOF OF LEMMA ??

*Proof.* Denote  $E_k^t = \exp(-\boldsymbol{\theta}_t^\top \mathbf{z}_k)$  and  $A_t^{i,j} = E_i^t/E_j^t$ . The goal is to show that  $\max_{i,j} A_t^{i,j} \leq c_3$  for some constant  $c_3 = 5c_0^2$ . We prove this by induction.

For the base case ( $t = 0$ ), we have  $E_k^0 = \exp(0) = 1$ . Therefore we have  $\max_{i,j} A_0^{i,j} = 1 \leq 5c_0^2$ .

For  $t > 0$ , to simplify the notation, let  $E_1^t$  and  $E_2^t$  denote values for the first and second samples and their ratio  $A_t := E_1^t/E_2^t$ . We want to show that  $A_{t+1} \leq 5c_0^2$  (note that a similar result can be obtained for any distinct pair thus the max also satisfies).

Notice that

$$\begin{aligned}
A_{t+1} &= \frac{\exp(-\boldsymbol{\theta}_{t+1}^\top \mathbf{z}_1)}{\exp(-\boldsymbol{\theta}_{t+1}^\top \mathbf{z}_2)} = \frac{\exp(-\boldsymbol{\theta}_t^\top \mathbf{z}_1)}{\exp(-\boldsymbol{\theta}_t^\top \mathbf{z}_2)} \cdot \frac{\exp(\alpha_t \nabla L(\boldsymbol{\theta}_t)^\top \mathbf{z}_1)}{\exp(\alpha_t \nabla L(\boldsymbol{\theta}_t)^\top \mathbf{z}_2)} \\
&= A_t \cdot \frac{\exp(-\alpha_t \sum_{k=1}^n (\mathbf{z}_k - \epsilon \partial \|\boldsymbol{\theta}_t\|_q)^\top \mathbf{z}_1 \cdot \exp(-\boldsymbol{\theta}_t^\top \mathbf{z}_k + \epsilon \|\boldsymbol{\theta}_t\|_q))}{\exp(-\alpha_t \sum_{k=1}^n (\mathbf{z}_k - \epsilon \partial \|\boldsymbol{\theta}_t\|_q)^\top \mathbf{z}_2 \cdot \exp(-\boldsymbol{\theta}_t^\top \mathbf{z}_k + \epsilon \|\boldsymbol{\theta}_t\|_q))} \\
&= A_t \cdot \underbrace{\frac{\exp(-\alpha_t (\mathbf{z}_1 - \epsilon \partial \|\boldsymbol{\theta}_t\|_q)^\top \mathbf{z}_1 \cdot \exp(-\boldsymbol{\theta}_t^\top \mathbf{z}_k + \epsilon \|\boldsymbol{\theta}_t\|_q))}{\exp(-\alpha_t (\mathbf{z}_2 - \epsilon \partial \|\boldsymbol{\theta}_t\|_q)^\top \mathbf{z}_2 \cdot \exp(-\boldsymbol{\theta}_t^\top \mathbf{z}_k + \epsilon \|\boldsymbol{\theta}_t\|_q))}}_{I_1} \\
&\quad \cdot \underbrace{\frac{\exp(-\alpha_t \sum_{k \neq 1}^n (\mathbf{z}_k - \epsilon \partial \|\boldsymbol{\theta}_t\|_q)^\top \mathbf{z}_1 \cdot \exp(-\boldsymbol{\theta}_t^\top \mathbf{z}_k + \epsilon \|\boldsymbol{\theta}_t\|_q))}{\exp(-\alpha_t \sum_{k \neq 2}^n (\mathbf{z}_k - \epsilon \partial \|\boldsymbol{\theta}_t\|_q)^\top \mathbf{z}_2 \cdot \exp(-\boldsymbol{\theta}_t^\top \mathbf{z}_k + \epsilon \|\boldsymbol{\theta}_t\|_q))}}_{I_2}. \tag{1}
\end{aligned}$$

For term  $I_1$ , note that by Lemma ?? we have

$$\sqrt{\frac{d}{c_0}} \leq \|\mathbf{z}_k\|_2 \leq \sqrt{c_0 d}.$$

Also since by Lemma 2, we have  $\|\partial \|\boldsymbol{\theta}_t\|_q\|_p = 1$ ,

$$\|\mathbf{z}_k^\top \partial \|\boldsymbol{\theta}_t\|_q\| \leq \|\mathbf{z}_k\|_q \cdot \|\partial \|\boldsymbol{\theta}_t\|_q\|_p = \|\mathbf{z}_k\|_q \leq \|\mathbf{z}_k\|_1 \leq \sqrt{d} \|\mathbf{z}_k\|_2 \leq \sqrt{c_0 d}. \tag{2}$$

Therefore, we have

$$\begin{aligned}
I_1 &\leq \exp\left(-\alpha_t \left(\frac{d}{c_0} - \epsilon \sqrt{c_0 d}\right) \exp(-\boldsymbol{\theta}_t^\top \mathbf{z}_1 + \epsilon \|\boldsymbol{\theta}_t\|_q) + \alpha_t (c_0 d + \epsilon \sqrt{c_0 d}) \exp(-\boldsymbol{\theta}_t^\top \mathbf{z}_2 + \epsilon \|\boldsymbol{\theta}_t\|_q)\right) \\
&= \exp\left(-\alpha_t E_2^t \left(\left(\frac{d}{c_0} - \epsilon \sqrt{c_0 d}\right) A_t - (c_0 d + \epsilon \sqrt{c_0 d})\right) \exp(\epsilon \|\boldsymbol{\theta}_t\|_q)\right). \tag{3}
\end{aligned}$$

For term  $I_2$ , by (??) and (2) we have

$$\begin{aligned}
I_2 &\leq \exp\left(\alpha_t \left(c_0 (\|\boldsymbol{\mu}\|_2^2 + \sqrt{d \log(n/\delta)}) + \epsilon \sqrt{c_0 d}\right) \left(\sum_{k \neq 1}^n \exp(-\boldsymbol{\theta}_t^\top \mathbf{z}_k + \epsilon \|\boldsymbol{\theta}_t\|_q) + \sum_{k \neq 2}^n \exp(-\boldsymbol{\theta}_t^\top \mathbf{z}_k + \epsilon \|\boldsymbol{\theta}_t\|_q)\right)\right) \\
&\leq \exp\left(2\alpha_t L(\boldsymbol{\theta}_t) \left(c_0 (\|\boldsymbol{\mu}\|_2^2 + \sqrt{d \log(n/\delta)}) + \epsilon \sqrt{c_0 d}\right)\right) \tag{4}
\end{aligned}$$

Substitute (3) and (4) into (1), we have

$$\begin{aligned}
A_{t+1} &\leq A_t \cdot \exp\left(-\alpha_t E_2^t \left(\left(\frac{d}{c_0} - \epsilon \sqrt{c_0 d}\right) A_t - (c_0 d + \epsilon \sqrt{c_0 d})\right) \exp(\epsilon \|\boldsymbol{\theta}_t\|_q)\right) \\
&\quad \cdot \exp\left(2\alpha_t L(\boldsymbol{\theta}_t) \left(c_0 (\|\boldsymbol{\mu}\|_2^2 + \sqrt{d \log(n/\delta)}) + \epsilon \sqrt{c_0 d}\right)\right). \tag{5}
\end{aligned}$$

Let us consider two cases here. If  $(d/c_0 - \epsilon\sqrt{c_0d})A_t - (c_0d + \epsilon\sqrt{c_0d}) > c_0d$ , i.e.,  $A_t > (2c_0 + \epsilon\sqrt{c_0})/(1/c_0 - \epsilon\sqrt{c_0})$ , we further have

$$\begin{aligned}
A_{t+1} &\leq A_t \cdot \exp\left(-\alpha_t E_2^t c_0 d \exp(\epsilon\|\boldsymbol{\theta}_t\|_q)\right) \cdot \exp\left(2\alpha_t L(\boldsymbol{\theta}_t)\left(c_0(\|\boldsymbol{\mu}\|_2^2 + \sqrt{d\log(n/\delta)}) + \epsilon\sqrt{c_0d}\right)\right) \\
&\leq A_t \cdot \exp\left(-\alpha_t E_2^t c_0 d \exp(\epsilon\|\boldsymbol{\theta}_t\|_q)\right) \\
&\quad \cdot \exp\left(2\alpha_t n E_2^t\left(c_0(\|\boldsymbol{\mu}\|_2^2 + \sqrt{d\log(n/\delta)}) + \epsilon\sqrt{c_0d}\right) \exp(\epsilon\|\boldsymbol{\theta}_t\|_q)\right) \\
&= A_t \cdot \exp\left(-\alpha_t E_2^t c_0(d - 2n\|\boldsymbol{\mu}\|_2^2 - 2n\sqrt{d\log(n/\delta)} - 2n\epsilon\sqrt{c_0}) \exp(\epsilon\|\boldsymbol{\theta}_t\|_q)\right) \\
&\leq A_t,
\end{aligned}$$

where the second inequality is due to the fact that  $L(\boldsymbol{\theta}_t) = \sum_{k=1}^n E_k^t \exp(\epsilon\|\boldsymbol{\theta}_t\|_q)$  and  $E_2^t = \max_k E_k^t$  while the last inequality holds since  $d \geq C \cdot \max\{n\|\boldsymbol{\mu}\|_2^2, n^2 \log(n/\delta)\}$ .

On the other hand, if  $A_t \leq (2c_0 + \epsilon\sqrt{c_0})/(1/c_0 - \epsilon\sqrt{c_0})$ , we have

$$\begin{aligned}
A_{t+1} &\leq A_t \cdot \exp\left(\alpha_t E_2^t(c_0d + \epsilon\sqrt{c_0d}) \exp(\epsilon\|\boldsymbol{\theta}_t\|_q)\right) \\
&\quad \cdot \exp\left(2\alpha_t L(\boldsymbol{\theta}_t)\left(c_0(\|\boldsymbol{\mu}\|_2^2 + \sqrt{d\log(n/\delta)}) + \epsilon\sqrt{c_0d}\right)\right) \\
&\leq A_t \cdot \exp\left(\alpha_t L(\boldsymbol{\theta}_t)(c_0d + \epsilon\sqrt{c_0d})\right) \cdot \exp\left(2\alpha_t L(\boldsymbol{\theta}_t)\left(c_0(\|\boldsymbol{\mu}\|_2^2 + \sqrt{d\log(n/\delta)}) + \epsilon\sqrt{c_0d}\right)\right) \\
&\leq A_t \cdot \exp\left(2\alpha_t n\left(c_0(2\|\boldsymbol{\mu}\|_2^2 + 2\sqrt{d\log(n/\delta)}) + d\right) + 3\epsilon\sqrt{c_0d}\right) \\
&\leq (2c_0 + \epsilon\sqrt{c_0})/(1/c_0 - \epsilon\sqrt{c_0}) \cdot \exp(1/8) \\
&\leq 5c_0^2,
\end{aligned}$$

where the first inequality is due to the fact that  $A_t > 0$ , the third inequality holds by Lemma ??, the fourth inequality is because  $\alpha_t \leq 1/(c_0 C n d)$  and  $d \geq C \cdot \max\{n\|\boldsymbol{\mu}\|_2^2, n^2 \log(n/\delta)\}$  and the last inequality is because  $\epsilon < C'$  and  $C'$  can be chosen such that  $C' \leq 1/(2c_0^{1.5})$  and we have  $1/c_0 - \epsilon\sqrt{c_0} > 1/(2c_0)$ .

This concludes the proof.  $\square$

## B.4 PROOF OF LEMMA ??

*Proof.* Note that

$$\begin{aligned}
\boldsymbol{\mu}^\top \boldsymbol{\theta}_{t+1} &= \boldsymbol{\mu}^\top \left(\boldsymbol{\theta}_t + \alpha_t \sum_{k=1}^n (\mathbf{z}_k - \epsilon \partial \|\boldsymbol{\theta}_t\|_q) \exp(-\boldsymbol{\theta}_t^\top \mathbf{z}_k + \epsilon \|\boldsymbol{\theta}_t\|_1)\right) \\
&= \boldsymbol{\mu}^\top \boldsymbol{\theta}_t - \alpha_t \epsilon \cdot \boldsymbol{\mu}^\top \partial \|\boldsymbol{\theta}_t\|_q \cdot L(\boldsymbol{\theta}_t) + \alpha_t \sum_{k=1}^n (\boldsymbol{\mu}^\top \mathbf{z}_k) \exp(-\boldsymbol{\theta}_t^\top \mathbf{z}_k + \epsilon \|\boldsymbol{\theta}_t\|_q) \\
&\geq \boldsymbol{\mu}^\top \boldsymbol{\theta}_t - \alpha_t \epsilon \|\boldsymbol{\mu}\|_q \cdot L(\boldsymbol{\theta}_t) + \alpha_t \sum_{k \in \mathcal{C}} (\boldsymbol{\mu}^\top \mathbf{z}_k) \exp(-\boldsymbol{\theta}_t^\top \mathbf{z}_k + \epsilon \|\boldsymbol{\theta}_t\|_q) \\
&\quad + \alpha_t \sum_{k \in \mathcal{N}} (\boldsymbol{\mu}^\top \mathbf{z}_k) \exp(-\boldsymbol{\theta}_t^\top \mathbf{z}_k + \epsilon \|\boldsymbol{\theta}_t\|_q),
\end{aligned} \tag{6}$$

where the inequality holds in the same way as in (2). By Lemma ?? ((?) and (?)), we further bound (6) by

$$\begin{aligned}
\boldsymbol{\mu}^\top \boldsymbol{\theta}_{t+1} &\geq \boldsymbol{\mu}^\top \boldsymbol{\theta}_t - \alpha_t \epsilon \|\boldsymbol{\mu}\|_q \cdot L(\boldsymbol{\theta}_t) + \frac{\alpha_t}{2} \sum_{k \in \mathcal{C}} \|\boldsymbol{\mu}\|_2^2 \exp(-\boldsymbol{\theta}_t^\top \mathbf{z}_k + \epsilon \|\boldsymbol{\theta}\|_q) \\
&\quad - \frac{3\alpha_t}{2} \sum_{k \in \mathcal{N}} \|\boldsymbol{\mu}\|_2^2 \exp(-\boldsymbol{\theta}_t^\top \mathbf{z}_k + \epsilon \|\boldsymbol{\theta}\|_q) \\
&= \boldsymbol{\mu}^\top \boldsymbol{\theta}_t - \alpha_t \epsilon \|\boldsymbol{\mu}\|_q \cdot L(\boldsymbol{\theta}_t) + \frac{\alpha_t}{2} \|\boldsymbol{\mu}\|_2^2 L(\boldsymbol{\theta}_t) - 2\alpha_t \|\boldsymbol{\mu}\|_2^2 \sum_{k \in \mathcal{N}} \exp(-\boldsymbol{\theta}_t^\top \mathbf{z}_k + \epsilon \|\boldsymbol{\theta}\|_q). \tag{7}
\end{aligned}$$

Note that we have

$$\begin{aligned}
\sum_{k \in \mathcal{N}} \exp(-\boldsymbol{\theta}_t^\top \mathbf{z}_k + \epsilon \|\boldsymbol{\theta}\|_q) &= \sum_{k \in \mathcal{N}} \exp(-\boldsymbol{\theta}_t^\top \mathbf{z}_k) \cdot \exp(\epsilon \|\boldsymbol{\theta}\|_q) \\
&\leq c_3(\eta + c_1)n \cdot \left( \max_k E_k \right) \cdot \exp(\epsilon \|\boldsymbol{\theta}\|_q) \\
&\leq c_3(\eta + c_1)L(\boldsymbol{\theta}_t) \\
&\leq \frac{1}{8}L(\boldsymbol{\theta}_t),
\end{aligned}$$

where the first inequality is due to Lemma ?? and the last inequality is because  $\eta < 1/C$  and  $c_1$  can be chosen arbitrarily small given sufficient large  $C$ . Therefore, (7) can be further written as

$$\begin{aligned}
\boldsymbol{\mu}^\top \boldsymbol{\theta}_{t+1} &\geq \boldsymbol{\mu}^\top \boldsymbol{\theta}_t - \alpha_t \epsilon \|\boldsymbol{\mu}\|_q \cdot L(\boldsymbol{\theta}_t) + \frac{\alpha_t}{2} \|\boldsymbol{\mu}\|_2^2 L(\boldsymbol{\theta}_t) - \frac{\alpha_t}{4} \|\boldsymbol{\mu}\|_2^2 L(\boldsymbol{\theta}_t) \\
&= \boldsymbol{\mu}^\top \boldsymbol{\theta}_t + \alpha_t \left( \frac{\|\boldsymbol{\mu}\|_2^2}{4} - \epsilon \|\boldsymbol{\mu}\|_q \right) \cdot L(\boldsymbol{\theta}_t) \\
&= \left( \frac{\|\boldsymbol{\mu}\|_2^2}{4} - \epsilon \|\boldsymbol{\mu}\|_q \right) \cdot \sum_{m=0}^t \alpha_m L(\boldsymbol{\theta}_m), \tag{8}
\end{aligned}$$

where the last equality is due to the fact that  $\boldsymbol{\theta}_0 = \mathbf{0}$ . Now we multiply  $\|\mathbf{w}\|_2 / \|\boldsymbol{\theta}_{t+1}\|_2$  on both sides of (8) and take  $t \rightarrow \infty$

$$\lim_{t \rightarrow \infty} \frac{\|\mathbf{w}\|_2 (\boldsymbol{\mu}^\top \boldsymbol{\theta}_{t+1})}{\|\boldsymbol{\theta}_{t+1}\|_2} \geq \lim_{t \rightarrow \infty} \left( \frac{\|\boldsymbol{\mu}\|_2^2}{4} - \epsilon \|\boldsymbol{\mu}\|_q \right) \frac{\|\mathbf{w}\|_2}{\|\boldsymbol{\theta}_{t+1}\|_2} \cdot \sum_{m=0}^t \alpha_m L(\boldsymbol{\theta}_m).$$

Since  $\|\mathbf{w}\|_2 = 1$ , and by Lemma ??, it is easy to observe that  $\mathbf{w} = \lim_{t \rightarrow \infty} \boldsymbol{\theta}_t / \|\boldsymbol{\theta}_t\|_2$ , we have

$$\begin{aligned}
\boldsymbol{\mu}^\top \mathbf{w} &\geq \left( \frac{\|\boldsymbol{\mu}\|_2^2}{4} - \epsilon \|\boldsymbol{\mu}\|_q \right) \cdot \lim_{t \rightarrow \infty} \frac{\sum_{m=0}^t \alpha_m L(\boldsymbol{\theta}_m)}{\|\boldsymbol{\theta}_{t+1}\|_2} \\
&\geq \left( \frac{\|\boldsymbol{\mu}\|_2^2}{4} - \epsilon \|\boldsymbol{\mu}\|_q \right) \frac{1}{(\sqrt{c_0} + \epsilon)\sqrt{d}}.
\end{aligned}$$

where the last inequality is due to Lemma ?. Note that Lemma ?? also suggests that  $\|\boldsymbol{\theta}_t / \|\boldsymbol{\theta}_t\|_2 - \mathbf{w}\|_2 \leq c_3 \log n / \log t$ , we have

$$\begin{aligned}
\boldsymbol{\mu}^\top \mathbf{w} &= \boldsymbol{\mu}^\top \left( \mathbf{w} - \frac{\boldsymbol{\theta}_t}{\|\boldsymbol{\theta}_t\|_2} + \frac{\boldsymbol{\theta}_t}{\|\boldsymbol{\theta}_t\|_2} \right) \\
&\leq \|\boldsymbol{\mu}\|_2 \cdot \left\| \mathbf{w} - \frac{\boldsymbol{\theta}_t}{\|\boldsymbol{\theta}_t\|_2} \right\|_2 + \frac{\boldsymbol{\mu}^\top \boldsymbol{\theta}_t}{\|\boldsymbol{\theta}_t\|_2} \\
&\leq \frac{c_3 \|\boldsymbol{\mu}\|_2 \log n}{\log t} + \frac{\boldsymbol{\mu}^\top \boldsymbol{\theta}_t}{\|\boldsymbol{\theta}_t\|_2}.
\end{aligned}$$

Therefore,

$$\frac{\boldsymbol{\mu}^\top \boldsymbol{\theta}_t}{\|\boldsymbol{\theta}_t\|_2} \geq \boldsymbol{\mu}^\top \mathbf{w} - \frac{c_3 \|\boldsymbol{\mu}\|_2 \log n}{\log t} \geq \left( \frac{\|\boldsymbol{\mu}\|_2^2}{4} - \epsilon \|\boldsymbol{\mu}\|_q \right) \frac{1}{(\sqrt{c_0} + \epsilon)\sqrt{d}} - \frac{c_3 \|\boldsymbol{\mu}\|_2 \log n}{\log t}.$$

□

## C AUXILIARY LEMMAS

**Theorem 1** (Proposition 5.10 in Vershynin [2010]). *Let  $X_1, X_2, \dots, X_n$  be independent centered sub-Gaussian random variables, and let  $K = \max_i \|X_i\|_{\psi_2}$ . Then for every  $a = (a_1, a_2, \dots, a_n) \in \mathbb{R}^n$  and for every  $t > 0$ , we have*

$$\mathbb{P}\left(\left|\sum_{i=1}^n a_i X_i\right| > t\right) \leq \exp\left(-\frac{Ct^2}{K^2\|a\|_2^2}\right),$$

where  $C > 0$  is a constant.

**Lemma 2.** *For any  $\theta \in \mathbb{R}^d$ ,*

$$\|\partial\|\theta\|_q\|_2 \leq \sqrt{d}, \quad \|\partial\|\theta\|_q\|_p = 1.$$

*Proof.* Note that we have

$$(\partial\|\theta\|_q)_i = \frac{\theta_i^{q-1}}{\|\theta\|_q^{q-1}} \cdot \text{sign}(\theta),$$

and since for any vector  $\mathbf{u} \in \mathbb{R}^d$ ,  $\|\mathbf{u}\|_q \geq \|\mathbf{u}\|_\infty$ ,  $\|\mathbf{u}\|_2 \leq \sqrt{d}\|\mathbf{u}\|_\infty$ , we have

$$\|\partial\|\theta\|_q\|_2 = \frac{\|\theta^{\circ(q-1)}\|_2}{\|\theta\|_q^{q-1}} \leq \frac{\sqrt{d}\|\theta\|_\infty^{q-1}}{\|\theta\|_q^{q-1}} \leq \sqrt{d},$$

where  $\circ$  denotes element-wise power. This concludes the first part of the lemma. For the second part, by  $p$ -norm definition, we have

$$\|\partial\|\theta\|_q\|_p = \frac{\|\theta^{\circ(q-1)}\|_p}{\|\theta\|_q^{q-1}} = \frac{1}{\|\theta\|_q^{q-1}} \left(\sum_{i=1}^d (\theta_i^{q-1})^p\right)^{1/p} = \frac{1}{\|\theta\|_q^{q-1}} \left(\left(\sum_{i=1}^d \theta_i^q\right)^{1/q}\right)^{q-1} = 1.$$

□

## D ADDITIONAL EXPERIMENTS

In this section, we present the additional experiments covering more settings as well as more complex models such as 2-layer neural network.

### D.1 ADVERSARIALLY TRAINED LINEAR CLASSIFIER UNDER VARIOUS SETTINGS

In Figures 1,2,3, we plot the adversarial risk of adversarially trained linear classifiers versus the training iterations  $t$  for different perturbation level  $\epsilon$  for various combinations of dimension  $d$  and  $\|\mu\|_2$ . Specifically, in Figure 3, we can observe that with moderate perturbations and sufficient over-parameterization, adversarially trained linear classifiers can achieve near-optimal adversarial risk.

### D.2 ADVERSARIALLY TRAINED 2-LAYER NEURAL NETWORKS

We have also conducted extra experiments on 2-layer neural networks with ReLU activation functions (one extra fix-dimension hidden layer). The data generation process are the same as our linear experiments. Note that in this setting, we no longer have the closed-form solutions to the inner maximization problem. Therefore, we following Madry et al. [2018] and use 10-step Projected Gradient Descent to get the inner maximizer.

As can be seen from Figure 4, the empirical results on 2-layer ReLU network suggest very similar trends as the linear classifier for both adversarial risk and standard risk. This further backs up our theoretical conclusions.

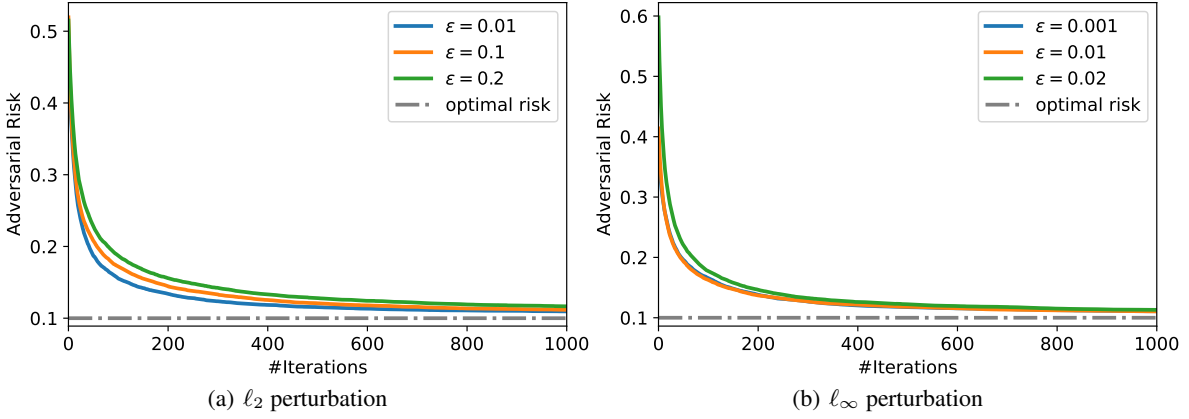

Figure 1: Risk and adversarial risk of adversarially trained linear classifiers versus the training iterations  $t$  for different perturbation level  $\epsilon$ . The label noise level is set as  $\eta = 0.1$ , the training set size  $n = 50$ , dimension  $d = 200$  and  $\|\mu\|_2 = d^{0.4}$ . The train error reaches 0 for all experiments.

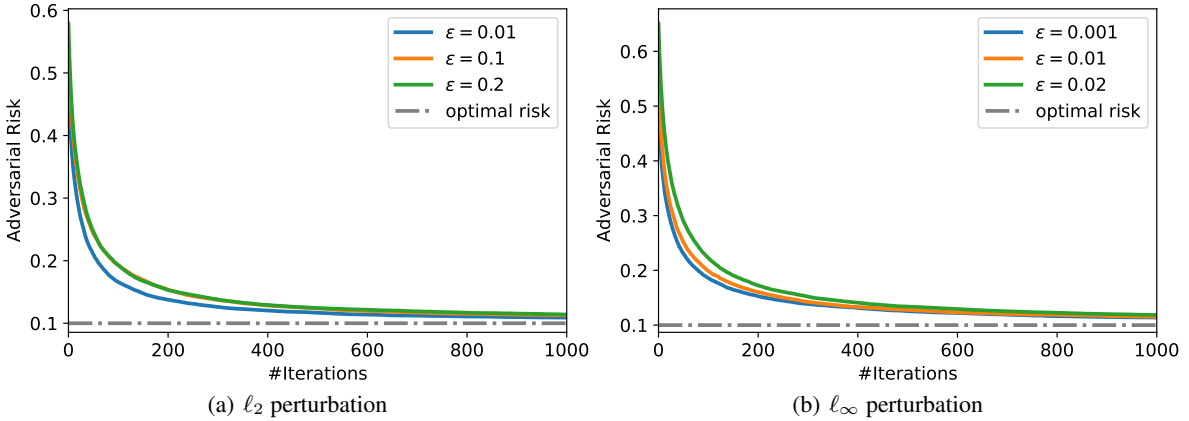

Figure 2: Risk and adversarial risk of adversarially trained linear classifiers versus the training iterations  $t$  for different perturbation level  $\epsilon$ . The label noise level is set as  $\eta = 0.1$ , the training set size  $n = 50$ , dimension  $d = 1000$  and  $\|\mu\|_2 = d^{0.3}$ . The train error reaches 0 for all experiments.

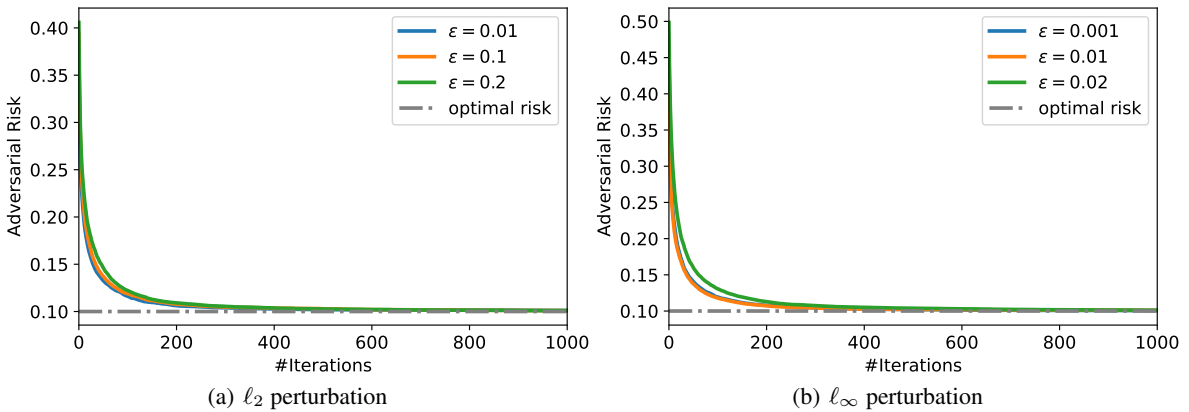

Figure 3: Risk and adversarial risk of adversarially trained linear classifiers versus the training iterations  $t$  for different perturbation level  $\epsilon$ . The label noise level is set as  $\eta = 0.1$ , the training set size  $n = 50$ , dimension  $d = 1000$  and  $\|\mu\|_2 = d^{0.4}$ . The train error reaches 0 for all experiments.

## References

Chen Dan, Yuting Wei, and Pradeep Ravikumar. Sharp statistical guarantees for adversarially robust gaussian classification. In *International Conference on Machine Learning*, pages 2345–2355. PMLR, 2020.

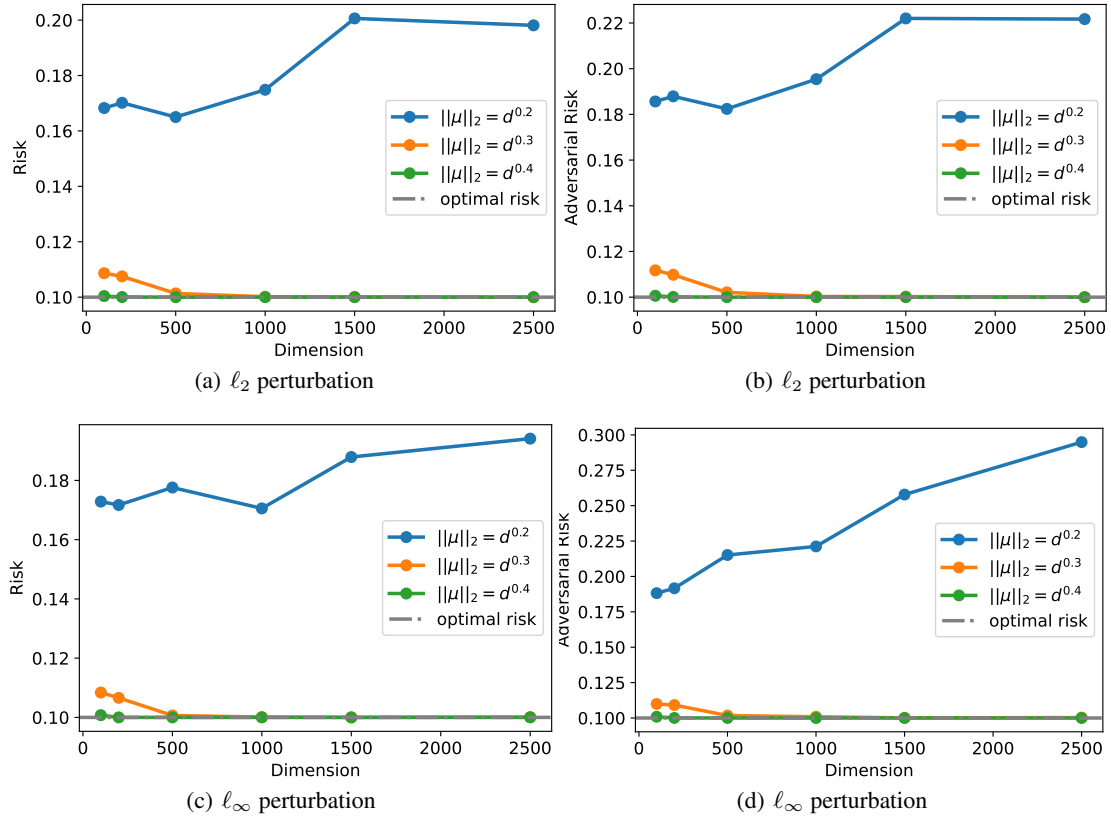

Figure 4: Risk and adversarial risk of adversarially trained 2-layer ReLU network versus the dimension  $d$  under different scalings of  $\mu$ . (a)(b) show the results for  $\ell_2$  perturbation with  $\epsilon = 0.1$  and (c)(d) show the results for  $\ell_\infty$  perturbation with  $\epsilon = 0.01$ . The training error reaches 0 for all experiments.

Adel Javanmard and Mahdi Soltanolkotabi. Precise statistical analysis of classification accuracies for adversarial training. *arXiv preprint arXiv:2010.11213*, 2020.

Yan Li, Ethan X.Fang, Huan Xu, and Tuo Zhao. Implicit bias of gradient descent based adversarial training on separable data. In *International Conference on Learning Representations*, 2020.

Aleksander Madry, Aleksandar Makelov, Ludwig Schmidt, Dimitris Tsipras, and Adrian Vladu. Towards deep learning models resistant to adversarial attacks. *ICML*, 2018.

Hossein Taheri, Ramtin Pedarsani, and Christos Thrampoulidis. Asymptotic behavior of adversarial training in binary classification. *arXiv preprint arXiv:2010.13275*, 2020.

Roman Vershynin. Introduction to the non-asymptotic analysis of random matrices. *arXiv preprint arXiv:1011.3027*, 2010.
